# Supplementary material for: High CTLA-4 transcriptomic expression correlates with high expression of other checkpoints and with immunotherapy outcome
Source: PubMed Central journal article supplement — Ther Adv Med Oncol. 2024 Jan 6;16:17588359231220510. doi: 10.1177/17588359231220510 (PMC10771755; doi:10.1177/17588359231220510), 2024-01-06
Supplement: sj-pdf-2-tam-10.1177_17588359231220510.pdf [file sj-pdf-2-tam-10.1177_17588359231220510.pdf]

**Supplemental Table 1. Examples of clinical trials evaluating anti-CTLA4 antibodies**

| <b>Drug Name/Company Mechanism</b>                                                       | <b>Combination strategy</b>                         | <b>Phase</b> | <b>Tumor Type</b>                     | <b>Results</b>                                                                                                                        | <b>Biomarker selection</b>          | <b>Comment (Status as of May 16, 2023)</b> | <b>Reference/NC T Number</b> |
|------------------------------------------------------------------------------------------|-----------------------------------------------------|--------------|---------------------------------------|---------------------------------------------------------------------------------------------------------------------------------------|-------------------------------------|--------------------------------------------|------------------------------|
| Ipilimumab/ Bristol-Myers Squibb/ recombinant monoclonal antibody that binds CTLA-4      | Single agent                                        | 3            | Melanoma                              | median OS of 10.1 months (95% CI, 8.0-13.8) (11)                                                                                      | No                                  | Completed. FDA approved                    | NCT00094653                  |
| Ipilimumab                                                                               | Nivolumab                                           | 3b/4         | Melanoma                              | The objective response rate (ORR) 45.6% (95% CI, 38.1%-53.1%) (22)                                                                    | No                                  | Completed FDA approved                     | NCT02714218                  |
| Ipilimumab                                                                               | Nivolumab (anti-PD-1)                               | 3            | NSCLC                                 | 4-year OS rate with nivolumab plus ipilimumab versus chemotherapy was 29% versus 18% (PD-L1 ≥1%); and 24% versus 10% (PD-L1 <1%) (23) | Yes/PD-L1                           | Completed FDA approved                     | CheckMate 227                |
| Ipilimumab                                                                               | Nivolumab (anti-PD-1)                               | 3            | RCC                                   | The objective response rate was 42% versus 27% for sunitinib (P<0.001), and the complete response rate was 9% versus 1% (24).         | No                                  | Completed FDA approved                     | NCT02231749                  |
| Tremelimumab/ AstraZeneca/ fully human monoclonal antibody                               | durvalumab, and platinum-based chemotherapy         | 3            | metastatic non-small cell lung cancer | Overall response rate was 39% (95% CI: 34,44) vs 24% (95% CI: 20, 29) in the chemotherapy arm (14,25-26)                              | Negative for EGFR and ALK mutations | Completed FDA approved                     | POSEIDON (NCT03164616)       |
| Tremelimumab                                                                             | Durvalumab (anti-PD-L1)                             | 3            | Unresectable or metastatic HCC        | Overall response rate was 20.1% in the tremelimumab plus durvalumab arm and 5.1% for those treated with sorafenib (27)                | No                                  | Completed FDA approved                     | HIMALAYA, NCT03298451        |
| Tremelimumab                                                                             | Durvalumab (anti-PD-L1) and chemoradiation          | I/2          | Esophageal cancer                     | Not reported                                                                                                                          | No                                  | Recruiting                                 | NCT02962063                  |
| Tremelimumab                                                                             | Durvalumab (anti-PD-L1) and chemoradiation          | 3            | Advanced or metastatic UCC            | End point not met (28)                                                                                                                | Stratified by PD-L1 status          | Completed not approved                     | Danube NCT02516241           |
| Quavonlimab/Merck / humanized immunoglobulin G1 monoclonal antibody that binds to CTLA-4 | Co-formulated Pembrolizumab/ Quavonlimab (MK-1308A) | 1/2          | Advanced solid tumors                 | Not reported                                                                                                                          | No                                  | Active not recruiting                      | NCT03179436                  |

|                                                                                                                                    |                                                                    |       |                                                                                            |                                                                                                                                            |                       |                             |             |
|------------------------------------------------------------------------------------------------------------------------------------|--------------------------------------------------------------------|-------|--------------------------------------------------------------------------------------------|--------------------------------------------------------------------------------------------------------------------------------------------|-----------------------|-----------------------------|-------------|
| Quavonlimab                                                                                                                        | Co-formulated Pembrolizumab/ Quavonlimab (MK-1308A)                | 2     | MSI-H or dMMR Metastatic Stage IV Colorectal Cancer. (29)                                  | Not reported                                                                                                                               | dMMR/MSI-H            | Recruiting                  | NCT04895722 |
| Quavonlimab                                                                                                                        | Co-formulated Pembrolizumab/ Quavonlimab (MK-1308A) and Lenvatinib | 3     | Advanced Renal Cell Carcinoma                                                              | Not reported                                                                                                                               | No                    | Active, recruiting          | NCT04736706 |
| Quavonlimab                                                                                                                        | Co-formulated Pembrolizumab/ Quavonlimab (MK-1308A)                | 2     | Microsatellite stable colorectal cancer                                                    | Not reported                                                                                                                               | Yes, GEP high Tmb low | Active, recruiting          | NCT03516981 |
| Zalifrelimab/ Agenus fully humanized IgG1 anti-CTLA-4                                                                              | Balstilimab (anti-PD-1)                                            | I/2   | Advanced cervical cancer                                                                   | The ORR was 25.6% (95% CI, 18.8%-33.9%), and the disease control rate (DCR) was 52% (95% CI, 43.3%-60.6%) (16, 30)                         | No                    | Completed, not FDA approved | NCT03495882 |
| Zalifrelimab                                                                                                                       | Balstilimab (anti-PD-1)                                            | 2     | Advanced cervical cancer                                                                   | Not reported                                                                                                                               | No                    | Recruiting                  | NCT05033132 |
| Zalifrelimab                                                                                                                       | NLM-001 and Standard Chemotherapy                                  | Ib/2a | Advanced pancreatic cancer                                                                 | Not reported                                                                                                                               | No                    | Complete FDA not approved   | NCT04827953 |
| Zalifrelimab                                                                                                                       | Doxorubicin chemotherapy                                           | 2     | Advanced or Metastatic Soft Tissue Sarcomas                                                | Not reported                                                                                                                               | No                    | Recruiting                  | NCT04028063 |
| Zalifrelimab                                                                                                                       | monotherapy                                                        | I/2   | Metastatic or Locally Advanced Solid Tumors, With Expansion to Second Line Cervical Cancer | Disease control rate (CR, PR, and SD) of 51.7%, objective response rate (ORR) of 10.3% (3/29), disease stabilization of 41.3% (12/29) (17) | No                    | Completed FDA not approved  | NCT03104699 |
| Botensilimab/ Agenus fragment crystallizable (Fc)-engineered immunoglobulin G1 anti-cytotoxic T-lymphocyte antigen 4 (anti-CTLA-4) | Monotherapy and in combination with Balstilimab (anti-PD-1)        | I     | Advanced solid tumors                                                                      | Not reported                                                                                                                               | No                    | Recruiting                  | NCT03860272 |

|                           |                             |       |                                                                                              |                                                                                                                |            |                    |             |
|---------------------------|-----------------------------|-------|----------------------------------------------------------------------------------------------|----------------------------------------------------------------------------------------------------------------|------------|--------------------|-------------|
| human monoclonal antibody |                             |       |                                                                                              |                                                                                                                |            |                    |             |
| Botensilimab              | Balstilimab (anti-PD-1)     | 1a/1b | metastatic heavily pretreated microsatellite stable colorectal cancer (MSS CRC)              | objective response rate (ORR) was 22% (95% CI, 12-35), disease control rate (DCR) was 73% (95% CI, 60-84) (31) | MSS Stable | Recruiting         | NCT03860272 |
| Botensilimab              | Balstilimab and Regorafenib | 1/2   | Microsatellite Stable Metastatic Colorectal Cancer Who Have Progressed on Prior Chemotherapy | Not reported                                                                                                   | MSS Stable | Not yet recruiting | NCT05672316 |

**Abbreviations:** ALK, anaplastic lymphoma kinase; CR, complete response; CTLA-4, cytotoxic T-lymphocyte antigen 4; dMMR, deficient mismatch repair; EGFR, epidermal growth factor receptor; FDA, food and drug administration; GEP, gene-expression profile; HCC, hepatocellular carcinoma; MSI, microsatellite instability; MSS, microsatellite stability; NSCLC, non-small cell lung cancer; OS, overall survival; PD-1, programmed death ligand-1; PR, partial response; RCC, renal cell carcinoma; SD, stable disease; Tmb, tumor mutational burden; UCC, urothelial cell carcinoma.

**Supplemental Table 2: Patient Characteristics**

|                                                                  |                                        |                                           |
|------------------------------------------------------------------|----------------------------------------|-------------------------------------------|
| <b>All cancers</b>                                               | N = 514                                |                                           |
| Median Age (range) years                                         | 61 (24-93) years                       |                                           |
| Sex                                                              | 40% male (N = 204), 60% female (N=310) |                                           |
| <b>Evaluable patients treated with immunotherapy</b>             | N=217 (42%)                            |                                           |
| Anti-PD1/PDL-1 single agents                                     | N=67 (31%)                             |                                           |
| Anti-PD1-PDL-1 combination with drugs other than immunotherapies | N=132 (61%)                            |                                           |
| Anti-CTLA-4 monotherapy                                          | N=2 (0 %)                              |                                           |
| Anti-CTLA-4 anti-PD1/PDL-1 combination therapy                   | N=16 (7%)                              |                                           |
| Other immunotherapies                                            | N=0 (0%)                               |                                           |
| <b>Diagnoses</b>                                                 | N=514 patients                         | N=217 evaluable patients treated with ICI |
| Head and Neck Cancer                                             | 12 (2%)                                | 5 (2%)                                    |
| Lung Cancer                                                      | 20 (4%)                                | 14 (6.5%)                                 |
| Liver and Bile Duct Cancer                                       | 19 (4%)                                | 9 (4%)                                    |
| Melanoma                                                         | 6 (1%)                                 | 6 (3%)                                    |
| Colorectal Cancer                                                | 140 (27%)                              | 54 (25%)                                  |
| Breast Cancer                                                    | 49 (10%)                               | 19 (9%)                                   |
| Esophageal Cancer                                                | 17 (3%)                                | 10 (5%)                                   |
| Neuroendocrine Cancer                                            | 15 (3%)                                | 5 (2%)                                    |
| Ovarian Cancer                                                   | 43 (8%)                                | 18 (8%)                                   |
| Pancreatic Cancer                                                | 55 (11%)                               | 16 (7%)                                   |
| Sarcoma                                                          | 24 (5%)                                | 9 (4%)                                    |
| Small Intestine Cancer                                           | 12 (2%)                                | 1 (0.5%)                                  |
| Stomach Cancer                                                   | 25 (5%)                                | 11 (5%)                                   |
| <b>Cancer of Unknown Primary</b>                                 | 13 (3%)                                | 5 (2%)                                    |
| Uterine Cancer                                                   | 24 (5%)                                | 12 (6%)                                   |
| Cervical Cancer                                                  | 5 (1%)                                 | 4 (1.8%)                                  |
| All Others (< 5 samples per histology)                           | 35 (7%)                                | 22 (10%)                                  |

(\* Database previously described (49))
